# Supplementary material for: Preparation of Tetra Pak-Based Hydrochars for Cleaning Water Polluted by Heavy Metal Ions: Physicochemical Properties and Removal Mechanism
Source: Hindawi journal article supplement (doi:10.1155/2023/3169510), 2023-08-02
Supplement: f1 [file 3169510.f1.docx]

**SUPPORTING INFORMATION**

| Percentage, % | a) Hg2+ | b) Pb2+ | c) Zn2+ |
| --- | --- | --- | --- |
|  | pH | | |

Figure S1. Speciation diagrams of heavy metal ions analyzed in this study.
